# Supplementary material for: Variable piperaquine exposure significantly impacts protective efficacy of monthly dihydroartemisinin-piperaquine for the prevention of malaria in Ugandan children
Source: Springer Nature journal article supplement (doi:10.1186/s12936-015-0908-8), 2015-09-24

**Simulated PK profile for weight strata 9 kg**

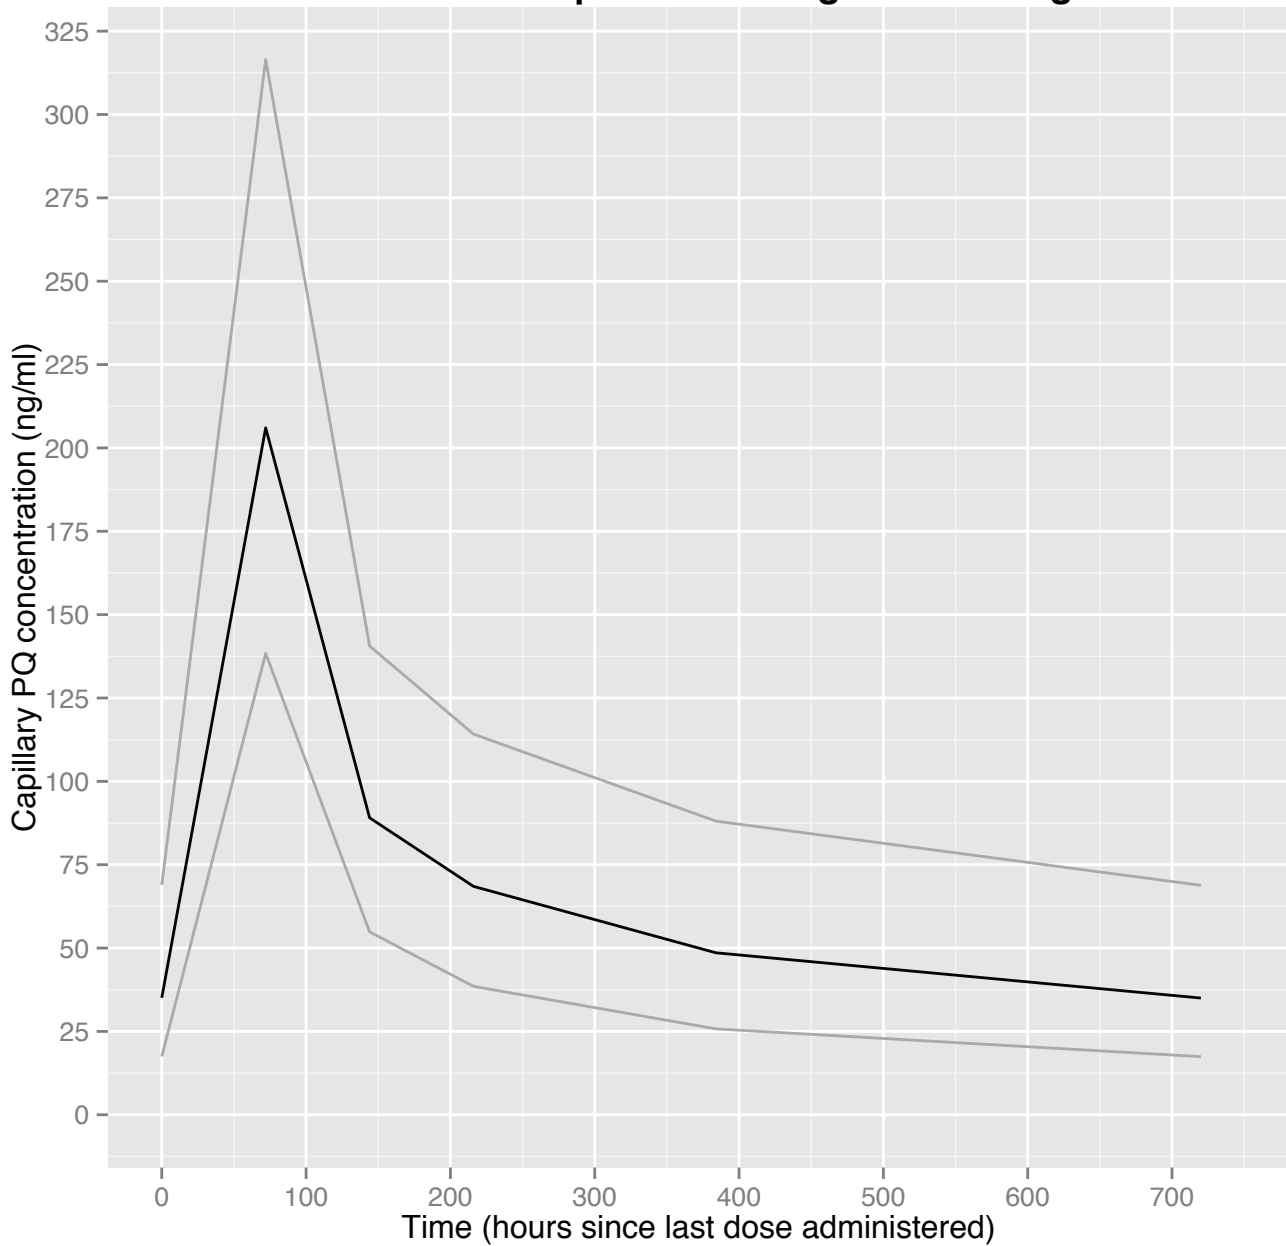

Supplement: MOESM1 [file 9761682]
